## Erratum

One of the co-editors' names was inadvertently missed from the cover and title page of *ICES Journal of Marine Science* 68(2) (symposium on "Issues Confronting the Deep Oceans"). The list of guest editors should have read as follows:

Gui Menezes, Odd Aksel Bergstad, Robert Brock, and Elizabethann English

The list has been corrected in the online version of the journal. ICES and the Journal management team apologize for this error.
